# Supplementary material for: Characteristics of the immunogenicity and tumor immune microenvironment in HER2-amplified lung adenocarcinoma
Source: PubMed Central journal article supplement (PMC9797999; doi:10.3389/fimmu.2022.1042072), 2022-12-15
Supplement: DataSheet_1.pdf [file DataSheet_1.pdf]

**A**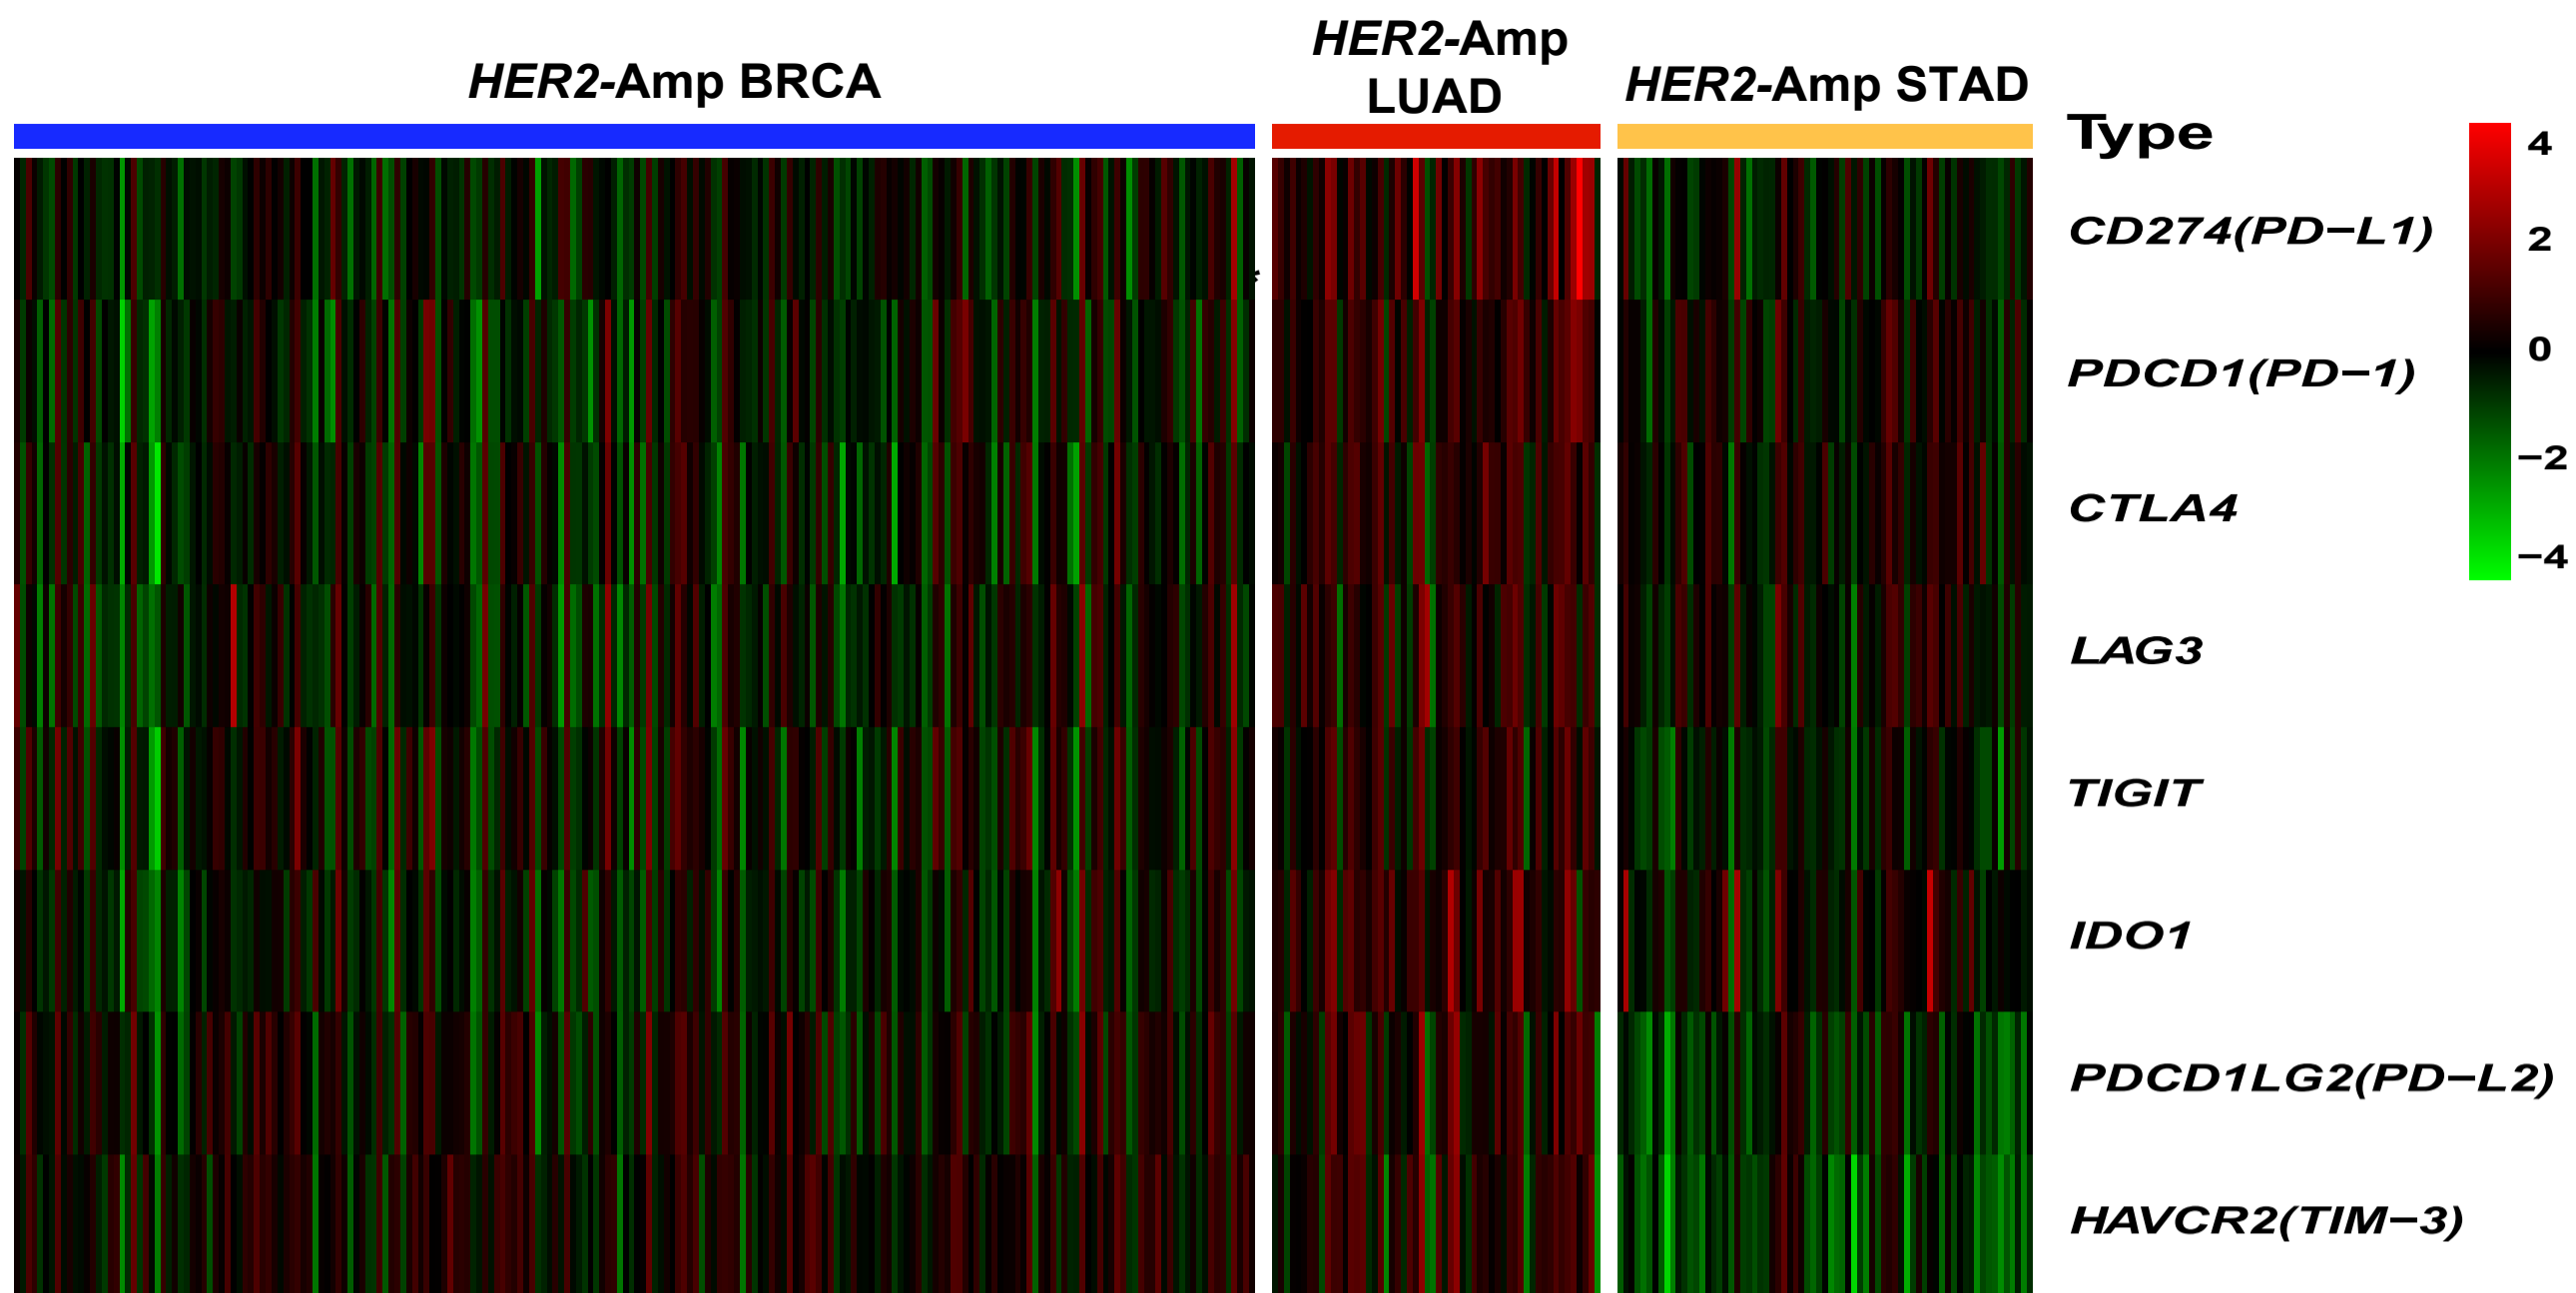**B**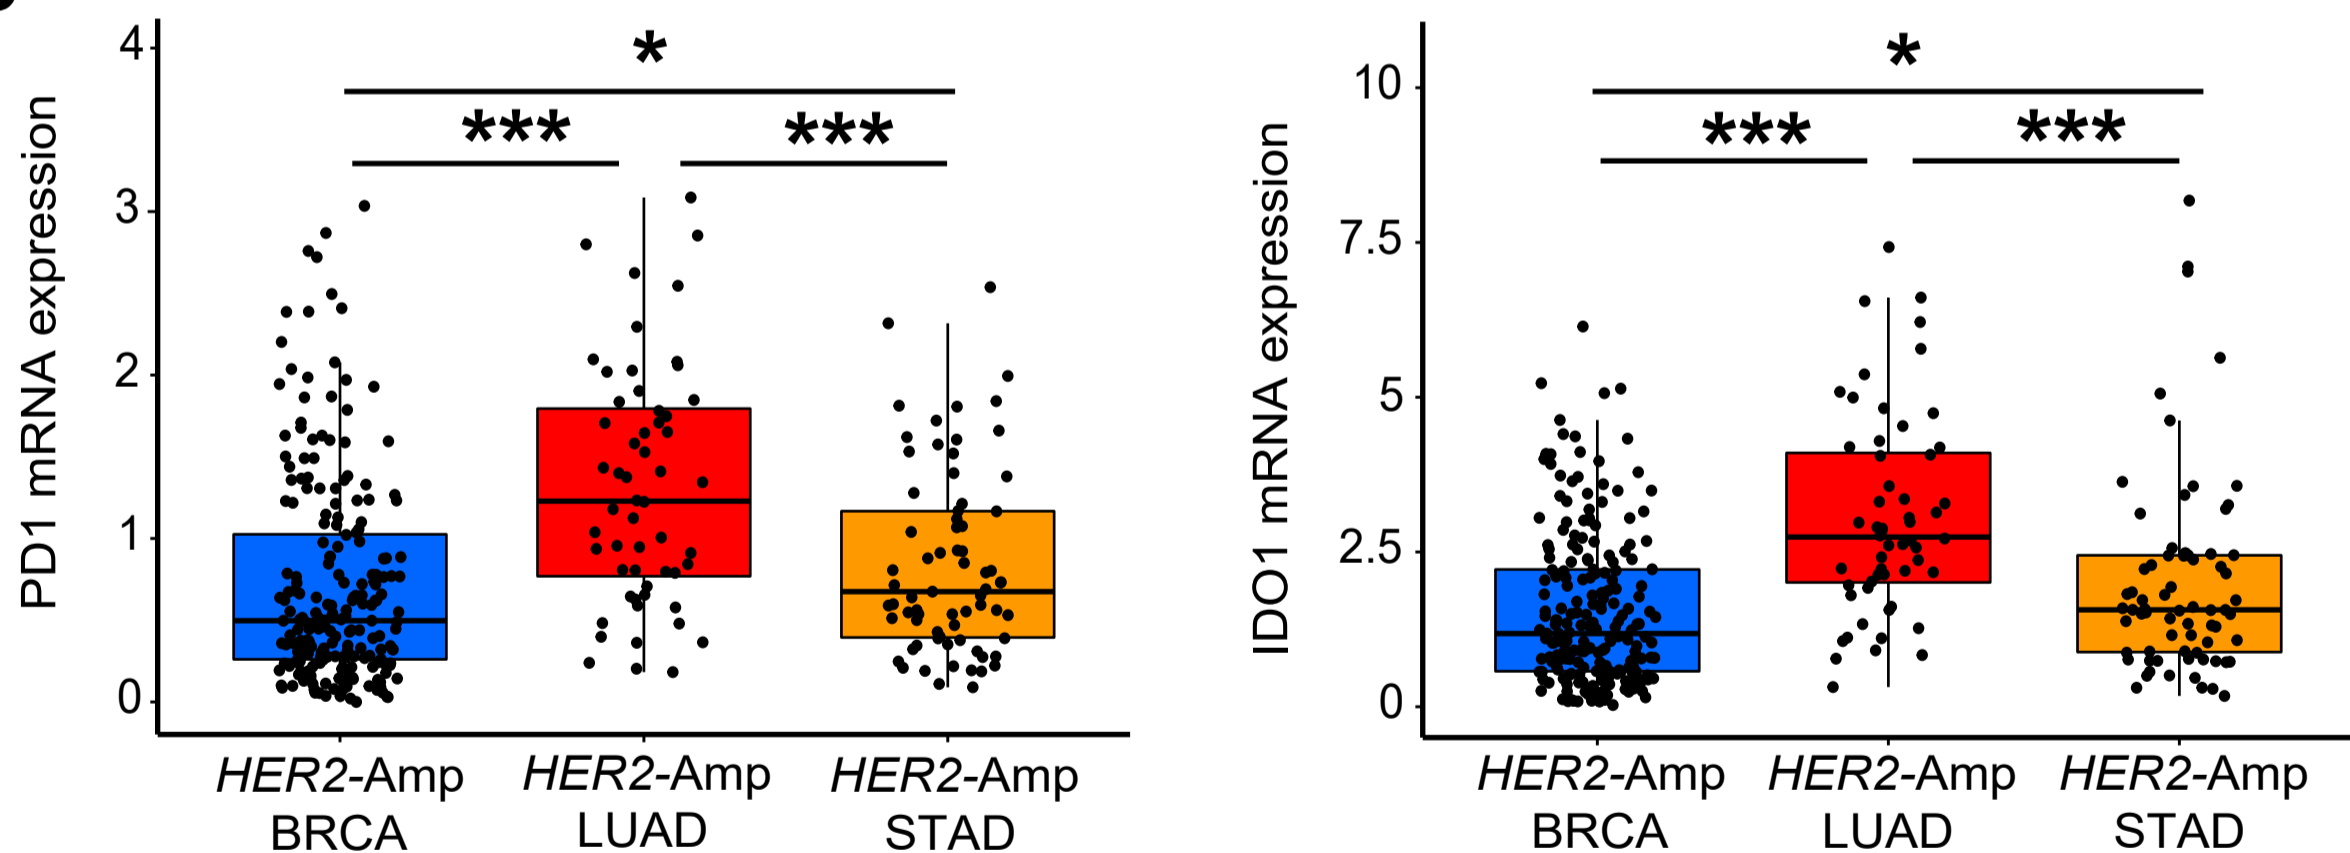

**Supplemental Figure 1. The expression of immune-related checkpoints in patients with *HER2* amplification among BRCA, LUAD and STAD.** A. Heatmap representation of relative mRNA expression levels of immune-related checkpoints from TCGA-RNAseq data. B. Quantitative analysis of significantly different expression of two immune checkpoints (PD-1 and IDO1) in *HER2*-amplified cohorts. Amp, amplification; BRCA, breast invasive carcinoma; LUAD, lung adenocarcinoma; STAD, stomach adenocarcinoma;  $P < 0.05$  was regarded as significantly different. \*\*\* $P < 0.001$ , \*\* $P < 0.01$ , \* $P < 0.05$ .
